# Supplementary material for: Prevalence and characterization of influenza viruses in diverse species in Los Llanos, Colombia
Source: PubMed Central journal article supplement — Emerg Microbes Infect. 2013 Apr 24;2(4):e20–. doi: 10.1038/emi.2013.20 (PMC3636595; doi:10.1038/emi.2013.20), 2013-04-24
Supplement: emi201320x3.pdf [file emi201320x3.pdf]

Supplementary Table S1: Prevalence of influenza viruses in wild birds by species

| Host (scientific name)                                         | No. screened | No. positives | Percent positive | No. subtyped |
|----------------------------------------------------------------|--------------|---------------|------------------|--------------|
| <b>Order Anseriformes</b>                                      | <b>592</b>   | <b>19</b>     | <b>3.2</b>       | <b>2</b>     |
| Black-bellied whistling duck ( <i>Dendrocygna autumnalis</i> ) | 489          | 14            | 2.9              | 1            |
| Muscovy duck ( <i>Cairina moschata</i> )                       | 2            | 0             | 0.0              |              |
| White-faced whistling duck ( <i>Dendrocygna viduata</i> )      | 71           | 5             | 7.0              | 1            |
| Blue-winged teal ( <i>Anas discor</i> )                        | 30           | 0             | 0.0              |              |
| <b>Order Apodiformes</b>                                       | <b>4</b>     | <b>0</b>      |                  |              |
| Neotropical palm swift ( <i>Tachornis squamata</i> )           | 1            | 0             |                  |              |
| Straight-billed hermit ( <i>Phaethornis bourcieri</i> )        | 2            | 0             |                  |              |
| White-tailed goldenthrout ( <i>Polytmus guainumbi</i> )        | 1            | 0             |                  |              |
| <b>Order Charadriiformes</b>                                   | <b>327</b>   | <b>9</b>      | <b>2.8</b>       |              |
| Black-necked stilt ( <i>Himantopus mexicanus</i> )             | 1            | 0             |                  |              |
| Pied plover ( <i>Vanellus cayanus</i> )                        | 3            | 0             |                  |              |
| Southern lapwing ( <i>Vanellus chilensis</i> )                 | 49           | 0             |                  |              |
| Snipe ( <i>Gallinago spp.</i> )                                | 4            | 0             |                  |              |
| Spotted sandpiper ( <i>Actitis macularia</i> )                 | 3            | 0             |                  |              |
| Wattled jacana ( <i>Jacana jacana</i> )                        | 21           | 3             | 14.3             |              |
| Yellow-billed tern ( <i>Sterna superciliaris</i> )             | 1            | 0             |                  |              |
| Mixed Charadriidae                                             | 206          | 9             | 4.4              |              |
| Yellowlegs ( <i>Tringa spp.</i> )                              | 39           | 0             |                  |              |
| <b>Order Coraciiformes</b>                                     | <b>11</b>    | <b>0</b>      |                  |              |
| Amazon kingfisher ( <i>Chloroceryle amazona</i> )              | 2            | 0             |                  |              |
| American pygmy kingfisher ( <i>Chloroceryle aenea</i> )        | 4            | 0             |                  |              |
| Blue-crowned motmot ( <i>Momotus momota</i> )                  | 1            | 0             |                  |              |
| Green kingfisher ( <i>Chloroceryle americana</i> )             | 4            | 0             |                  |              |
| <b>Order Ciconiiformes</b>                                     | <b>1</b>     | <b>0</b>      |                  |              |
| Maguari stork ( <i>Ciconia maguari</i> )                       | 1            | 0             |                  |              |
| <b>Order Cuculiformes</b>                                      | <b>2</b>     | <b>0</b>      |                  |              |
| Smooth-billed ani ( <i>Crotophaga ani</i> )                    | 2            | 0             |                  |              |
| <b>Order Galliformes</b>                                       | <b>3</b>     | <b>0</b>      |                  |              |
| Crested bobwhite ( <i>Colinus cristatus</i> )                  | 2            | 0             |                  |              |
| Crestless curassow ( <i>Crax tomentosum</i> )                  | 1            | 0             |                  |              |
| <b>Order Passeriformes</b>                                     | <b>31</b>    | <b>1</b>      | <b>3.2</b>       |              |
| Bicknell's thrush ( <i>Catharus bicknelli</i> )                | 1            | 0             |                  |              |
| Blue-gray tanager ( <i>Thraupis episcopus</i> )                | 1            | 0             |                  |              |
| Boat-billed flycatcher ( <i>Megarynchus pitangua</i> )         | 2            | 0             |                  |              |
| Buff-throated saltator ( <i>Saltator maximus</i> )             | 1            | 0             |                  |              |
| Great kiskadee ( <i>Pitangus sulphuratus</i> )                 | 1            | 0             |                  |              |
| Palm tanager ( <i>Thraupis palmarum</i> )                      | 3            | 0             |                  |              |
| Piratic flycatcher ( <i>Legatus leucophagi</i> )               | 1            | 0             |                  |              |
| Red-breasted blackbird ( <i>Sturnella militaris</i> )          | 5            | 0             |                  |              |
| Rufous-and-white wren ( <i>Thryothorus rufalbus</i> )          | 1            | 0             |                  |              |
| Rusty-margined flycatcher ( <i>Myiozetetes cayenensis</i> )    | 4            | 0             |                  |              |
| Shiny cowbird ( <i>Molothrus bonariensis</i> )                 | 1            | 0             |                  |              |
| Silver-beaked tanager ( <i>Ramphocelus carbo</i> )             | 1            | 0             |                  |              |
| Tropical kingbird ( <i>Tyrannus melancholicus</i> )            | 4            | 0             |                  |              |
| Yellow-breasted flatbill ( <i>Tolmomyas flaviventris</i> )     | 1            | 0             |                  |              |
| Yellow-browed sparrow ( <i>Ammodramus aurifrons</i> )          | 2            | 0             |                  |              |
| White-eyed tody-tyrant ( <i>Hemitriccus zosterops</i> )        | 2            | 1             | 50.0             |              |
| <b>Order Pelicaniformes</b>                                    | <b>343</b>   | <b>8</b>      | <b>2.3</b>       |              |
| Cattle egret ( <i>Bubulcus ibis</i> )                          | 239          | 7             | 2.9              |              |
| Great egret ( <i>Ardea alba</i> )                              | 4            | 0             |                  |              |
| Heron (Ardeidae mixed)                                         | 100          | 6             | 6.0              |              |
| <b>Order Piciformes</b>                                        | <b>1</b>     | <b>0</b>      |                  |              |
| Spot-breasted woodpecker ( <i>Colaptes punctigula</i> )        | 1            | 0             |                  |              |
| <b>Mixed (Various waterbird species)</b>                       | <b>628</b>   | <b>26</b>     | <b>4.1</b>       |              |
| <b>Unknown Species (Exotic)</b>                                | <b>70</b>    | <b>2</b>      | <b>2.9</b>       |              |
| <b>Total</b>                                                   | <b>2013</b>  | <b>58</b>     | <b>2.9</b>       | <b>2</b>     |
